# Supplementary material
Source: publisher figshare collection journal article supplement (https://springernature.figshare.com/ndownloader/files/31091609)
Supplement: Supplementary file 1 [file 31091609]

## Sheet: README
Additional file 3 to Soininen et al Environmental Evidence -- Coding template and description of coded variables
Contains the coding template used for data entry, as described in the systematic map protocol (Soininen et al 2018)
including definitions of variables, eligible vaues for the dropdown menus and references to data layers.
Datasheet	Description
Variable definitions	Contains description of all included variables. Includes information on the variable in general, as well as potential values and how these are defined. Also description of the source (P from publication, C coded based on publication and D extracted from other data sources) and entry type (open-ended, drop-down menu).
Dropdown values	Contains source data from the dropdown menus.
CODING_template	Contains coding template used for data entry. Variables are described briefly. For further guidance and examples on variable levels, see the sheet "variable definitions".
References	References to the spatial data sources mentioned in this document for variables extracted from other data sources (coded as D for source in Variable definitions).

## Sheet: Variable definitions
Topic	Coding_variable	Variable description	Type	Source	Possible values	Description of levels	Editing comments
study ID	author_list	list of authors	open-ended	P	Comma separated list of authors last names (e.g. Soininen, Barrio, Jepsen, Ehrich, Ravolainen, Speed)
	title	title of the publication	open-ended	P	full title of the publication
	journal	journal or publishing house	open-ended	P	full name of the journal (e.g. Environmental Evidence)
	year	year of publication	open-ended	P	integer value for year (e.g. 2017)
	language	language	drop-down menu	P	english
					russian
					other
	evidence_point_ID	ID number that separates the different evidence points within the same publication	open-ended	C	integer	1, unless the publication includes several evidence points. In such case these are coded separately, with numbers starting from one (i.e. 1,2,3, etc). Separate evidence points are recorded when separate parts of the study differ from each other in terms of study design (i.e. different datasets of plant-herbivore pairs") or in terms of environmental context (i.e. dataset compiled from various loca…
study location	country	country name, as specified by the authors, coerced to one of the options in the drop-down menu. If several countries are involved, select "several" and specify the country names or "circumpolar" in the comments box. If the name of the location is not specified in the study, and no geographical location can be attributed, the study should be excluded.	drop-down menu	P	Alaska	country name, as specified by the authors, coerced to one of the options in the drop-down menu
					Canada
					Greenland
					Svalbard/Jan Mayen
					Iceland
					Norway
					Sweden
					Finland
					Russia
					several	if more than one country, list of countries; "circumpolar" as an option
					other	country name is not reported by the authors and it is not straightforward to interpret from the study
	locality	site name describing the locality, as specified in the study (report here as specific as you can). When a study mimicks the specific conditions in a certain region (for example in a greenhouse experiment), report here the site/region that was mimicked, not the place where actual study was conducted (e.g. location of the greenhouse)	open-ended	P	site name as described in the paper		Spelling of locality names was edited across study sites for consistency after all studies were coded
	coordinates_N	geographic coordinates as reported in the study. If needed, these can be obtained from figures or inferred from maps. If the area reported is large, take the average value	open-ended	P	decimal degrees , N
					not available	geographic coordinates are not reported in the study
	coordinates_E	geographic coordinates as reported in the study. If needed, these can be obtained from figures or inferred from maps. If the area reported is large, take the average value	open-ended	P	decimal degrees , E
					not available	geographic coordinates are not reported in the study
	year_start	year when the study started, measuring both the plant and the herbivore parts. For example, in a study looking at increases in goose populations since 1986, but measuring changes in plant communities in 2003 in areas with and without geese, the start year would be 2003	open-ended	P	integer value for year (e.g. 2017)
					not reported
	year_end	year when the study finished, measuring both the plant and the herbivore parts. For studies spanning one year or less, start and end year will be the same	open-ended	P	integer value for year (e.g. 2017)
					not reported
	elevation		open-ended	P	integer value, meters above sea level	Single value as reported by the authors. We cannot infer elevation from studies if they only report they were conducted in "coastal areas"
					two values (min, max) to indicate range in elevation covered covered by studies across elevation gradients	Values as reported by the authors, minimum and maximum to report the range in elevation.
					not reported	Value for elevation not reported in the study.
	elevation_DEM	from [1]	extracted	D	integer value (m a.s.l.)	elevation (m a.s.l.) extracted from digital elevation model
study type	study_design	Study design type. NB. We do not include "several" as an option here, as evidence points coming from separate study designs should be reorded separately, even if they come from the same study.	drop-down menu	C	experimental	Experimental studies; i.e. treatment/exposure allocated randomly to the study units. For example study looking at reindeer grazing inside and outside exclosures that were randomly allocated to half of the study plots (the remaining half acting as controls).
					observational	Observational studies, i.e. treatment/exposure not allocated/determined by the researcher. Have no clear treatments, outcome measures or experimental units. E.g. studies looking at the effects of rodent herbivory across different phases of population cycle.	Observational and quasi-experimental were pooled together, as it appeared to be difficult to distinguish between these in a repeatable manner.
					quasi-experimental	Quasi-experimental studies; treatment/exposure not randomly allocated by the researcher. Either allocated by the researcher in a non-random way, or by using existing contrasts (i.e. "natural experiments"). In ecology usually the latter, for example studies comparing plant community composition before and after a moth outbreak or across reindeer fence. Differ from experiments as they lack random a…	Observational and quasi-experimental were pooled together, as it appeared to be difficult to distinguish between these in a repeatable manner.
					modelling	studies using simulations
					not reported
					other	other study types not included above, please specify
	experimental_design	For experimental, quasi-experimental, and some observational studies; how were the treatments and controls implemented?	drop-down menu	C	before-after-control-impact	experimental or quasi-experimental studies using a BACI approach looking at responses before and after the implementation of a treatment, as well as comparing with a control
					before-after	experimental, quasi-experimental or observational studies using a BA approach looking at responses before and after the implementation of a treatment (there is no control)
					control-impact	experimental, quasi-experimental or observational studies looking at the effects of implementing a treatment compared to plots not implementing it (controls)
					unclear	not possible to assess
					not relevant	modelling studies, observational studies that do not fall into the above categories
	study_method		drop-down menu	C	field	studies conducted in the field
					greenhouse	experimental studies conducted in greenhouse (including phytotron studies)
					remote sensing	studies conducted using remote sensing data
					modelling
					other	other types of study methods; please specify
	exposure_quantification	Approach used to create or assess the difference in herbivory (i.e. how are differences in exposure quantified).	drop-down menu	C	exclosure	herbivores are excluded from an area
					fence	fence separating two areas with different intensity of grazing
					enclosure	known herbivore densities are kept within an area
					herbivore population up	herbivore population increases
					herbivore population down	herbivore population decreases
					herbivore outbreak	herbivore population undergoes an outbreak
					simulated herbivory	e.g. clipping, nutrient addition, trampling, faeces, urine…
					spatial contrast/gradient	herbivory is assessed e.g. along a spatial gradient or at contrasting densities of the herbivore
					several	several of the above-mentionded, specified in the comments
					other	Other than the above-mentioned, specified in the comments. For instance, herbivore density is assessed along a temporal contrast/gradient that does not fit with the above-mentioned i.e. (increase, decrease, outbreak)
					not relevant	e.g. modelling studies
					not reported
	additional_exposures	The other factor herbivory was contrasted/analysed with. For example factorial experiments with treatments on grazing and warming, observational studies looking at a change of vegetation when both herbivore population density and climate warming occur.	drop-down menu	C	warming
					precipitation/drought
					snow manipulation
					UV
					CO2
					ozone
					nutrient manipulation	those that are not mimicking herbivore depositions
					heavy metals
					none	if no additional treatments were done
					several	several, please specify
					not relevant
					other	other, please specify
	extent_of_spatial_scale	size of the study area -- the polygon that encompasses all the plots measuring a particular outcome. Sometimes it is difficult to calculate from figures, but rough estimates can be made of a square around the study area reported in figures in Google Maps.	drop-down menu	C	up to 1x1 km	size of the study area is 1x1 km or less.
					from 1x1 km to 10x10 km	size of the study area is between 1x1 km and 10x10 km (including 10x10 km).
					from 10x10 km to 100x100 km	size of the study area is between 10x10 km and 100x100 km (including 100x100 km).
					from 100x100 km to 1000x1000 km	size of the study area is between 100x100 km and 1000x1000 km (including 1000x1000 km).
					larger than 1000x1000 km	size of the study area is larger than 1000x1000 km.
					not relevant	extent not relevant for the study, for example in greenhouse experiments
					not reported	when several sites are described but data is reported only for some of them without defining which or lacking important details
	spatial_resolution_recorded	spatial scale at which the outcome was RECORDED ("plot" size). For example, studies can record their measurements at 30x30 cm point-intercept frames, eventhough they would aggregate measurements for analyses.	drop-down menu	C	up to 1x1 m (including 1x1 m)	spatial scale at which the outcome was RECORDED ("plot" size) is 1x1 m or less.
					from 1x1 m to 10x10 m (including 10x10m)	spatial scale at which the outcome was RECORDED ("plot" size) is between 1x1 m and 10x10 m (including 10x10m).
					from 10x10 m to 100x100 m (including 100x100 m)	spatial scale at which the outcome was RECORDED ("plot" size) is between 10x10 m and 100x100 m (including 100x100m).
					from 100x100 m to 1000x1000 m (including 1000x1000m)	spatial scale at which the outcome was RECORDED ("plot" size) is between 100x100 m and 1000x1000 m (including 1000x1000m).
					larger than 1000x1000 m	spatial scale at which the outcome was RECORDED ("plot" size) is larger than 1000x1000 m.
					not relevant	extent not relevant for the study, for example in greenhouse experiments
					not reported	when several sites are described but data is reported only for some of them without defining which or lacking important details
	spatial_resolution_reported	spatial scale at which the outcome is REPORTED. In many studies the measurements are aggregated and reported at much larger scale than the scale at which they are recorded. For example, COAT Varanger intensive design uses 30x30 cm point framing plots, but data are analysed at 15x15 m scale; here resolution reported would be "from 10x10 m to 100x100 m".	drop-down menu	C	up to 1x1 m (including 1x1 m)	spatial scale at which the outcome is REPORTED is 1x1 m or less.
					from 1x1 m to 10x10 m (including 10x10m)	spatial scale at which the outcome is REPORTED is between 1x1 m and 10x10 m (including 10x10m).
					from 10x10 m to 100x100 m (including 100x100 m)	spatial scale at which the outcome is REPORTED is between 10x10 m and 100x100 m (including 100x100m).
					from 100x100 m to 1000x1000 m (including 1000x1000m)	spatial scale at which the outcome is REPORTED is between 100x100 m and 1000x1000 m (including 1000x1000m).
					larger than 1000x1000 m	spatial scale at which the outcome is REPORTED is larger than 1000x1000 m.
					not relevant	extent not relevant for the study, for example in greenhouse experiments
					not reported	when several sites are described but data is reported only for some of them without defining which or lacking important details
	extent_of_temporal_scale	length of study (year end minus year start plus one). The period of study should include the time when both plant and herbivore elements were measured.	integer	P	number of years	If several time lengths, report longest length. If less than year, report zero.
	temporal_resolution	interval between measurements of the outcome (plant), if regular or not and how long	drop-down menu	C	once	measurements were only taken once
					twice, interval one year or shorter	measurements were taken twice, interval was one year or shorter
					twice, interval longer than one year	measurements were taken twice, interval was longer than one year
					annual	measurements were taken every year (at yearly intervals), more than two times
					regular with intervals shorter than a year	measurements were taken at regular intervals shorter than a year
					regular with intervals longer than a year	measurements were taken at regular intervals longer than a year
					irregular with intervals shorter than a year	measurements were taken at irregular intervals, but shorter than a year
					irregular with intervals longer than a year	measurements were taken at irregular intervals, longer than a year. For example, a study measuring vegetation annually during the first three years but every 3 years after that
					not reported	frequency of measurements not reported
	redundancy	studies that are using exactly the same data (redundant) or adding to a dataset (partly redundant) and reporting on the same outcome. This will be assessed at the end, by looking at overlapping geographical coordinates of the study.	drop-down menu	C	redundant
					partly redundant
					not redundant
population: plant	biological_organization_level_recorded	Biological organization level at which the outcome was measured. Some studies may measure outcomes at the individual plant level, even if they report their results at the species level.	drop-down menu	C	individual	Measurements were taken at the individual plant level or lower. Also when several species are included, but the measures are recorded at individual level. For example number of flowers per individual, number of biting signs per individual, overwinter mortality/survival of marked individuals.
		Recording/reporting several biological organization levels is not a reason to record the study as several evidence points. For example a study looking at vole herbivory effect on willow sampling mortality (recorded as individual survival) and willow biomass (recorded species-group specific data) in one experimental setup would be one evidence point.			population/species	Measurements were taken at population/species level, either in one site (population) or at several sites (species). Also when several species are included but measures are recorded for each species separately, at the species/population level. For example biomass of a given species per plot, biomass of all species that are present per plot, number of flowers per species per plot.
					groups of species	Measurements were taken for a group of species without distingusihing between species, for example biomass of tall shrubs, graminoids or another functional or taxonomic plant group.
					community	Measurements were taken at the community level. This includes "vascular plant community". For example total biomass per square meter, diversity measures (species richness, diversity indeces), NDVI. Also proportion of bare ground per plot (as it also measures the proportion of vegetated surface, i.e. a community level measure).
					several	Several, please specify. For example when both species richness and plant species specific biomass are recorded.
					not reported
					other	other, please specify
	biological_organization_level_reported	Biological organization level at which the outcome was reported. Some studies may measure outcomes at the individual plant level but report their results at the species level.	drop-down menu	C	individual	Measurements were reported at the individual plant level or lower. Also when several species are included, but the measures are reported at individual level. For example number of flowers per individual, number of biting signs per individual, overwintering survival per individual.
		Recording/reporting several biological organization levels is not a reason to record the study as several evidence points. For example a study looking at vole herbivory effect on willow sampling mortality (recorded as individual survival) and willow biomass (recorded species-group specific data) in one experimental setup would be one evidence point.			population/species	Measurements were taken at population/species level, either in one site (population) or at several sites (species). Also when several species are included but measures are done for each species separately. For example biomass of a given species per plot, biomass of all species that are present per plot, number of flowers per species per plot, or over-wintering survival of a species per site.
					groups of species	Measurements were reported for a group of species without distingusihing between species, for example biomass of tall shrubs, graminoids or another functional or taxonomic plant group.
					community	Measurements were reported at the community level. This includes "vascular plant community". For example total biomass per square meter, diversity measures (species richness, diversity indeces), NDVI. Also proportion of bare ground per plot (as it also measures the proportion of vegetated surface, i.e. a community level measure).
					several	Several, please specify. For example when both total biomass and plant species specific biomass are reported.
					other	other, please specify
	identity_of_biological_organization_unit	For individual and population categories in the biological organization level a species list, for groups of species and communities identity as reported by authors (e.g. tall shrub heath, deciduous shrubs)	open-ended	P	list	Latin names of the studied species if available.
	management_plant	management status of the targeted plant, plant species or community	drop-down menu	P	logging
					fertilizing
					harvested
					burning
					managed grazing
					not reported
	conservation_plant	conservation status of the targeted plant, plant species or community	drop-down menu	C	red listed	when the target plant is described as endangered or red listed
					invasive/introduced	when the target plant is described as invasive, introduced, or in other manner increasing in abundance in a negative manner
					increased/range expansion	when the target plant is described to have an increasing population desnity or increasing distributional range
					no concern	for example when the target plant is described as common
					other
					not reported	no mentioning on the target plants rarity/commoness
Outcome: the effect of herbivory on plant(s)	measured_response_variable	what was measured on the plants following exposure to herbivory	drop-down menu	P/C	biomass	biomass reported as mass (usually per a given area), independent of the method that was used to aquire it (usually clipping or point-intercept frequancy)
					other abundance measure	including occurrence of a species, abundance/frequency (also point-intercept frequancy when not calibrated to give biomass estimates), presence/absence
					NDVI or other vegetation indices
					cover	vegetation cover, generally expressed as percentage cover of a given area
					diversity	including species richness and different indices of diversity
					survival/mortality	survival and mortality of whole plant or clone (e.g. shoot mortality in graminoids)
					reproduction/recruitment	any measure of reproduction, e.g. number of flowers, viability of seeds, establishment of new shoots
					other demographic measure
					morphological measure	including canopy height, leaf demography (e.g. how many new leaves appear/disappear)...
					population density
					physiological response	including measures of plant chemistry
					productivity	the rate of generation of new biomass (usually reported as mass per unit per time)
					direct signs of herbivory	for example evidence of leaf damage by invertebrate herbivores, presence or frequency of occurrence of galls, browsing marks, etc. includes percentage of cover of damage
					several	several, please specify
					other	other, please specify
Exposure: herbivory	herbivore_identity	A species name or a species list, or other definition as given by the authors. If simulated herbivory, specify which herbivore/group of herbivores was simulated	open-ended	P	species name or species list	Latin names of the studied species if available.
					not reported
	herbivore_type	Herbivore functional group	drop-down menu	C	small rodents and pikas	vertebrate herbivores wintering below snow or hibernating
					waterfowl	vertebrate herbivores migrating away from Arctic in winter
					other vertebrates	vertebrate herbivores wintering above snow
					galling invertebrates
					mining invertebrates
					defoliating invertebrates
					phloem feeders
					bark and stem borers
					root feeding invertebrates
					invertebrates feeding on reproductive structures	invertebrates that focus on fruits, seeds, berries, flowers…
					unknown	also for simulated herbivory if it is not clear what was simulated
					several	when a study looks at the effects of herbivores of different feeding guilds, either separately or in combination
	herbivory_season	when herbivory happens (not when the measurement happens)	drop-down menu	C	summer	snow-free period
					winter	snow-covered period
					spring	snow-melt period
					autumn	snow-onset period
					year-round
					several	herbivory occurs during several seasons, please specify
					not reported	including "unknown" and "undefined"
	effect_type	Type of effect the herbivore has on target plants, as reported by authors. Includes all effect the authors discuss, not only those that are measured (e.g. a study that introduces their target herbivore to have both fertilizing and plant part removal effects, but measures only flower removal, would be recorded as several; plant plant removal and fertilizing). In contrast, if no fertilization was m…	drop-down menu	C	removal of plant parts	removal of leaves, roots, twigs, reproductive parts
					disturbance
					fertilizing
					several	several, please specify
					other	other, please specify
					not reported
	management_herbivore	management status of the targeted herbivore(s)	drop-down menu	P/C	non-managed	If it is obvious that they are not managed (this kind of species never managed)
					domesticated
					semi-domesticated
					hunted	hunted for leisure/food
					control to limit population	e.g. biological control; adding pests, chemical; spraying, mechanical?; hunting/trapping
					several	several, please specify
					other	other, please specify
					not reported	no mentioning on the target herbivores management, but not obvious that it could never be managed
	conservation_herbivore	conservation status of the targeted herbivore(s.	drop-down menu	C	red listed	when the target herbivore is described as endangered or red listed
					invasive/introduced	when the target herbivore is described as invasive, introduced, or in other manner increasing in abundance in a negative manner
					increased/range expansion	when the target herbivore is described to have an increasing population density or increasing distributional range
					protected from hunting	when the target herbivore is protected from hunting
					no concern	for example when the target herbivore is described as common
					not relevant	may include simulated herbivory, modelling studies
					several	several, please specify (e.g. when several different target herbivores)
					other	other, please specify
					not reported	no mentioning on the target herbivores rarity/commoness/protection status
Modifier: ecological context	management	do the authors report any managed herbivores (including target herbivores) or managed plants being present?	drop-down menu	C	managed herbivore
					managed plant
					not reported
	management_area	Management status of the study area. management here is defined separately from area protection (that is addressed in the conservation status)	drop-down menu	C	historical
					current
					historical and current
					not reported	including "not relevant"
	conservation_study_area	conservation status of the study area	drop-down menu	C	rare habitat
					protected area
					common habitat
					not relevant
					not reported
					other
	distance_to_treeline	Distance to southern border of arctic subzone E [2].	extracted	D	distance in km
	temperature	temperature (C) as reported in the study	open-ended	P	temperature (C)	when many values given, provide range and overall mean
					not reported
	temperature_measure	type of temperature measure reported, e.g. mean annual temperature, average temperature of the warmest month...	open-ended	P	type of temperature measurement
					not reported
	precipitation	precipitation (mm) as reported in the studies	open-ended	P	precipitation (mm)
					not reported
	precipitation_measure	type of precipitation measurement given (e.g. annual sum)	open-ended	P	type of precipitation measurement
					not reported
	climate_axis_1	First PCA axis describing climate based on WorldClim[3] bioclimatic variables (mainly temperature)	extracted	D	numeric value		The three main PCA axis of variation of climatic variables proposed in the systematic map protocol were not used in the final analysis, but rather the exploration of WorldClim variables.
	climate_axis_2	Second PCA axis describing climate based on WroldClim[3] bioclimatic variables (mainly precipitation)	extracted	D	numeric value		The three main PCA axis of variation of climatic variables proposed in the systematic map protocol were not used in the final analysis, but rather the exploration of WorldClim variables.
	climate_axis_3	Third PCA axis describing climate based on WroldClim[3] bioclimatic variables (mainly variability)	extracted	D	numeric value		The three main PCA axis of variation of climatic variables proposed in the systematic map protocol were not used in the final analysis, but rather the exploration of WorldClim variables.
	growing_season	Duration of growing season (days) [4]	extracted	D	numeric value
	distance_from_coast	Distance in km [5]	extracted	D	numeric value
	bioclimatic_zone	Bioclimatic zone A to E [2], other for subarctic areas	extracted	D	bioclimatic zone A
					bioclimatic zone B
					bioclimatic zone C
					bioclimatic zone D
					bioclimatic zone E
					other	areas outside the bioclimatic zone E
	soil_type	Soil type according to [6]	extracted	D	acidic
					circumneutral
					carbonate
					saline
					other	areas outside the substrate chemistry data layer
	productivity	value of NDVI (vegetation greenness) [4]	extracted	D	numeric value
	productivity_P	Productivity description as reported by the authors (e.g. high productivity habitats)	open-ended	P	qualitative observation
					not reported
	extent_of_recent_warming	from [8]	extracted	D	numeric value
	extent_of_recent_greening	from [4]	extracted	D	numeric value
	extent_of_recent_growing_season_change	from [4]	extracted	D	numeric value
	herbivore_diversity	species richness of vertebrate herbivores (count) [9]	extracted	D	count of species
	habitat_type_P	habitat type as reported by the authors	open-ended	P		Any information that the authors give to describe the habitat(s) where they worked. Both general terms and lists of common species etc.
					not reported
	habitat_type_C	habitat types -- fewer categories	extracted	C	Categories will be defined afterwards when the habitat categories by authors have been recorded.
	disturbance	disturbance that occurs in the study system and could impact the results/is discussed by the authors	drop-down menu	C	fire
					human infrastructure
					pollution
					insect outbreaks (when outbreaks not in focus)
					rodent outbreaks (when rodents not in focus)
					other herbivory
					flooding
					geomorphological issues
					icing/winter damage
					several	several, please specify
					other	other, please specify
					not reported	including not relevant
	permafrost	presence of permafrost according to [10]	extracted	D	numeric value
Additional information on study scope	food_web_context_other_herbivores	Is the presence of other herbivores in the study area described?	drop-down menu	C	mentioned	when other herbivores are listed (e.g. in the description of the tudy area), even if no food web focus of the study
					documented by referring to another study
					quantified in the study
					not reported
	food_web_context_predators	Is the presence of other predators in the study area described?	drop-down menu	C	mentioned	when predators are listed (e.g. in the description of the study area), even if no food web focus of the study
					documented by referring to another study
					quantified in the study
					not reported
	conservation_focus	Is the study framed within a conservation context (i.e. conservation aims are mentioned or not)?	drop-down menu	C	mentioned
					not reported
Comment	comment		open-ended	C		Any additional comments. For example additional climate measures that are reported (e.g. snow depth), experimental strategies not accomodated by the variable codes (e.g. exclosures are selective for small and large herbivores).

## Sheet: Dropdown values
Values for dropdown menus
language	country	study_design	experimental_design	study method	exposure_quantification	additional_exposures	extent_of_spatial_scale	spatial_resolution_recorded/reported	temporal_resolution	redundancy	biological_organization_level_recorded	biological_organization_level_reported	management_plant	conservation_plant	measured_response_variable	herbivore_type	herbivory_season	effect_type	management_herbivore	bioclimatic_zone	conservation_herbivore	management	management_area	conservation_study_area	disturbance	food_web_context_other_herbivores/predators	conservation_focus	soil_type
english	Alaska	experimental	before-after-control-impact	field	exclosure	warming	1x1 km or less	up to 1x1 m (including 1x1 m)	once	redundant	individual	individual	logging	red listed	biomass	small rodents and pikas	summer	removal of plant parts	non-managed	bioclimatic zone A	red listed	managed herbivore	historical	rare habitat	fire	mentioned	mentioned	acidic
russian	Canada	observational	before-after	greenhouse	fence	precipitation/drought	from 1x1 km to 10x10 km (including 10x10 km)	from 1x1 m to 10x10 m (including 10x10m)	twice, interval one year or shorter	partly redundant	population/species	population/species	fertilizing	invasive/introduced	other abundance measure	waterfowl	winter	disturbance	domesticated	bioclimatic zone B	invasive/introduced	managed plant	current	protected area	human infrastructure	documented by referring to another study	not reported	circumneutral
other	Greenland	quasi-experimental	control-impact	remote sensing	enclosure	snow manipulation	from 10x10 km to 100x100 km (including 100x100 km)	from 10x10 m to 100x100 m (including 100x100 m)	twice, interval longer than one year	not redundant	groups of species	groups of species	harvested	increased/range expansion	NDVI or other vegetation indices	other vertebrates	spring	fertilizing	semi-domesticated	bioclimatic zone C	increased/range expansion	not reported	historical and current	common habitat	pollution	quantified in the study		carbonate
	Svalbard/Jan Mayen	modelling	unclear	modelling	herbivore population up	UV	from 100x100 km to 1000x1000 km (including 1000x1000 km)	from 100x100 m to 1000x1000 m (including 1000x1000m)	annual		community	community	burning	no concern	cover	galling invertebrates	autumn	several	hunted	bioclimatic zone D	protected from hunting		not reported	not relevant	insect outbreaks (when outbreaks not in focus)	not reported		saline
	Iceland	not reported	not relevant	other	herbivore population down	CO2	larger than 1000x1000 km	larger than 1000x1000 m	regular with intervals shorter than a year		several	several	managed grazing	other	diversity	mining invertebrates	year-round	other	control to limit population	bioclimatic zone E	no concern			not reported	rodent outbreaks (when rodents not in focus)			other
	Norway	other			herbivore outbreak	ozone	not relevant	not relevant	regular with intervals longer than a year		not reported	other	not reported	not reported	survival/mortality	defoliating invertebrates	several	not reported	several	other	not relevant			other	other herbivory
	Sweden				simulated herbivory	nutrient manipulation	not reported	not reported	irregular with intervals shorter than a year		other				reproduction/recruitment	phloem feeders	not reported		other		several				flooding
	Finland				spatial contrast/gradient	heavy metals			irregular with intervals longer than a year						other demographic measure	bark and stem borers			not reported		other				geomorphological issues
	Russia				several	none			not reported						morphological measure	root feeding invertebrates					not reported				icing/winter damage
	several				other	several									population density	invertebrates feeding on reproductive structures									several
	other				not relevant	not relevant									physiological response	unknown									other
					not reported	other									productivity	several									not reported
															direct signs of herbivory
															several
															other

## Sheet: CODING_template
Topic	Coding variable	Variable description	Type	Source	Value
study ID	author_list	list of authors	open-ended	P
	title	title of the publication	open-ended	P
	journal	journal or publishing house	open-ended	P
	year	year of publication	open-ended	P
	language	language of the publication	drop-down menu	P
	language_comments	if language is "other", please specify	open-ended	P
	evidence_point_ID	ID number that separates the different evidence points within the same publication	open-ended	C
study location	country	country name, as specified by the authors, coerced to one of the options in the drop-down menu. If several countries are involved, select "several" and specify the country names or "circumpolar" in the comments box. If the name of the location is not specified in the study, and no geographical location can be attributed, the study should be excluded.	drop-down menu	P
	country_comments	fill out if country is "several" or "other"		P
	locality	site name describing the locality, as specified in the study (report here as specific as you can). When a study mimicks the specific conditions in a certain region (for example in a greenhouse experiment), report here the site/region that was mimicked, not the place where actual study was conducted (e.g. location of the greenhouse)	open-ended	P
	coordinates_N	geographic coordinates as reported in the study, preferrably in decimal degrees (if not, report here as is, and transform later) or "not available" (if geographic coordinates are not reported in the study). If needed, coordinates can be obtained from figures or inferred from maps. If the area reported is large, take the average value.	open-ended	P
	coordinates_E	geographic coordinates as reported in the study, preferrably in decimal degrees (if not, report here as is, and transform later) or "not available" (if geographic coordinates are not reported in the study). If needed, coordinates can be obtained from figures or inferred from maps. If the area reported is large, take the average value.	open-ended	P
	year_start	year when the study started, measuring both the plant and the herbivore parts, or "not reported". For example, in a study looking at increases in goose populations since 1986, but measuring changes in plant communities in 2003 in areas with and without geese, the start year would be 2003	open-ended	P
	year_end	year when the study finished, measuring both the plant and the herbivore parts, or "not reported". For studies spanning one year or less, start and end year will be the same	open-ended	P
	elevation	elevation (m a.s.l.) expressed as a single value, a range (min, max) or "not reported". Do not infer elevation from qualitative statements (e.g. "coastal areas" does not equate to elevation=0)	open-ended	P
	elevation_DEM	elevation (m a.s.l.) extracted from digital elevation model [1]	open-ended	D
study type	study_design	indicate if the study involved experimental manipulations (either in the field or the greenhouse), quasi-experimental design (no randomization of treatments, including "natural experiments"), observational studies (e.g. studies using gradients or spatial contrasts), modelling, not reported or other types (please specify)	drop-down menu	C
	study_design_comments	if study design is "other", please specify		C
	experimental_design	If experimental or quasi-experimental, BACI, BA, CI or unclear; "not relevant" in the case of non-experimental or modelling studies. Can also be relevant for some observational studies (BA).	drop-down menu	C
	study_method	if the study was conducted in the field, greenhouse, using remote sensing data, modelling or other (please specify in comments box)	drop-down menu	C
	study_method_comments	please specify if study method is "other"		C
	exposure_quantification	approach used to create or assess the difference in herbivory, including exclosures, fences that separate areas with different densities of herbivores, enclosures, different temporal trends in herbivore populations (increasing, decreasing or outbreaks), simulated herbivory, spatial gradients or contrasts, or other approaches (please specify below). As well, it is possible that this is not reporte…	drop-down menu	C
	exposure_quantification_comments	if "other", please specify		C
	additional_exposures	in factorial designs, the other factor herbivory was contrasted with. For example in studies looking at the interaction between grazing and warming.	drop-down menu	P
	additional_treatments_comments	if "other", please specify
	extent_of_spatial_scale	size of the study area -- the polygon that encompasses all the plots measuring a particular outcome. Sometimes it is difficult to calculate from figures, but rough estimates can be made of a square around the study area reported in figures using Google Maps.	drop-down menu	C
	spatial_resolution_recorded	spatial scale at which the outcome was RECORDED ("plot" size). For example, studies can record their measurements at 30x30 cm point-intercept frames, eventhough they would aggregate measurements for analyses.	drop-down menu	C
	spatial_resolution_reported	spatial scale at which the outcome is REPORTED. In many studies the measurements are aggregated and reported at much larger scale than the scale at which they are recorded. For example, COAT Varanger intensive design uses 30x30 cm point framing plots, but data are analysed at 15x15 m scale; here resolution reported would be "from 10x10 m to 100x100 m".	drop-down menu	C
	extent_of_temporal_scale	length of study (year end minus year start plus one). The period of study should include the time when both plant and herbivore elements were measured.	open-ended	P
	temporal_resolution	interval between measurements of the outcome (plant), if regular or not and how long, or if frequency of measurements was not reported	drop-down menu	C
	redundancy	studies that are using exactly the same data (redundant) or adding to a dataset (partly redundant) and reporting on the same outcome. This will be assessed at the end, by looking at overlapping geographical coordinates of the study.	drop-down menu	C
population: plant	biological_organization_level_recorded	biological organization level at which the outcome was measured. Some studies may measure outcomes at the individual plant level, even if they report their results at the species level. Here, authors can "not report" at which level they recorded the outcome. If "other", please specify in the comments box.	drop-down menu	C
	biological_organization_recorded_comments	if "other", please specify
	biological_organization_level_reported	biological organization level at which the outcome was reported. Some studies may measure outcomes at the individual plant level but report their results at the species level. If "other", please specify in the comments box.	drop-down menu	C
	biological_organization_reported_comments	if "other", please specify
	identity_of_biological_organization_unit	For individual and population categories in the biological organization level a species list, for groups of species and communities list of units as reported by authors (e.g. tall shrub heath, deciduous shrubs)	open-ended	P
	management_plant	management status of the targeted plant, plant species or community	drop-down menu	P
	conservation_plant	what conservation status the plant has, or if it is "not relevant" (e.g. in studies simulating herbivory or in many modelling studies). If "other", please specify in the comments box	drop-down menu	C
	conservation_plant_comments	if "other", please specify
Outcome: the effect of herbivory on plant(s)	measured_response_variable	what was measured on the plants following exposure to herbivory. If "other", please specify in comments box	drop-down menu	P/C
	measured_response_comments	if "other", please specify
Exposure: herbivory	herbivore_identity	A species name or a species list, or other definition as given by the authors. If simulated herbivory, specify which herbivore/group of herbivores was simulated. "Not reported" where not relevant or unclear.	open-ended	P
	herbivore_type	type of herbivore the study deals with. It could be unknown (for example in studies simulating herbivory where the type of herbivore is unclear). If a study looks at the effects of several types of herbivores, please specify in the comments box	drop-down menu	C
	herbivore_type_comments	if "several", please specify		C
	herbivory_season	when herbivory happens (not when the measurement happen), or "not reported" (including unknown and undefined)	drop-down menu	C
	herbivory_season_comment	if "several", please specify		C
	effect_type	type of effect the herbivore has on target plants, as reported by authors	drop-down menu	C
	effect_type_comments	if "several" or "other", please specify		C
	management_herbivore	management status of the targeted herbivore(s), or non-managed if it is obvious that they are not managed (this kind of species never managed)	drop-down menu	P/C
	management_herbivore_comments	if "other", please specify		P/C
	conservation_herbivore	what conservation status the herbivore has, if it is "not relevant" (e.g. in studies simulating herbivory or in many modelling studies)	drop-down menu	C
	conservation_herbivore_comments	if "other", please specify
Modifier: ecological context	management	do the authors report any managed herbivores (including target herbivores) or managed plants being present?	drop-down menu	C
	management_area	management here is defined separately from area protection (that is addressed in the conservation status)	drop-down menu	C
	conservation_study_area	is the area of conservation concern?	drop-down menu	C
	conservation_study_area_comment	if "other", please specify		C
	distance_to_treeline	Distance (km) to southern border of arctic subzone E from [2]	open-ended	D
	temperature	temperature (C) as reported in the study (single value or range with average), or "not reported"	open-ended	P
	temperature_measure	type of temperature measure reported (e.g. mean annual temperature, average temperature of the warmest month...) or not reported	open-ended	P
	precipitation	precipitation (mm) as reported in the studies, or not reported	open-ended	P
	precipitation_measure	type of precipitation measurement given (e.g. annual sum), or not reported	open-ended	P
	climate_axis_1	First PCA axis describing climate based on WorldClim bioclimatic variables (mainly temperature) [3]	open-ended	D
	climate_axis_2	First PCA axis describing climate based on WroldClim bioclimatic variables (mainly precipitation) [3]	open-ended	D
	climate_axis_3	First PCA axis describing climate based on WroldClim bioclimatic variables (mainly variability) [3]	open-ended	D
	growing_season	Duration of growing season (days), according to [4]	open-ended	D
	distance_from_coast	Distance in km, extracted from [5]	open-ended	D
	bioclimatic_zone	bioclimatic zone A to E, other , according to [2]	drop-down menu	D
	soil_type	soil type according to [6]	drop-down menu	D
	productivity	value of NDVI (vegetation greenness), according to [4]	open-ended	D
	productivity_P	Productivity description as reported by the authors (e.g. high productivity habitats): qualitative observation or not reported	open-ended	P
	recent_warming	extent of recent warming according to [8]	open-ended	D
	recent_greening	extent of recent greening according to [4]	open-ended	D
	extent_of_recent_growing_season_change	extent of recent change in growing season length according to [4]	open-ended	D
	herbivore_diversity	species richness of vertebrate herbivores (count) according to [9]	open-ended	D
	habitat_type_P	habitat type as reported by the authors, or not reported (including not relevant)	open-ended	P
	habitat_type_C	habitat types -- fewer categories. We will define categories afterwards, once the habitat categories by authors have been recorded. Also possible "not relevant" (for example in greenhouse experiments)	drop-down menu	C
	disturbance	if present, what other disturbance may influence the system, or not reported (including not relevant)	drop-down menu	C
	disturbance_comment	if "other", please specify		C
	permafrost	presence of permafrost according to [10]	extracted	D
Additional information on study scope	food_web_context_other_herbivores	if the food web structure (relating to other herbivores is mentioned. when other herbivores are listed (e.g. in the description of the study area), even if the focus of the study is not on food webs	drop-down menu	C
	food_web_context_predators	if the food web structure (relating to predators) is mentioned. when predators are listed (e.g. in the description of the study area), even if the focus of the study is not on food webs	drop-down menu	C
	conservation_focus	if the study is framed within a conservation context (i.e. conservation aims are mentioned or not)	drop-down menu	C
Comment	comment	Any additional comments	open-ended	C

## Sheet: References
Reference number	Variables	Reference (proposed in systematic map protocol)	Reference (used in systematic map)
1	elevation_DEM	Digital elevation model used for creation of the Circumpolar Arctic Vegetation Map (reference nr. 2). Areas outside this from ASTER Global Digital Elevation Map	Jarvis, A., et al., Hole-filled seamless SRTM data V4, International Centre for Tropical Agriculture (CIAT), available from https://srtm.csi.cgiar.org. 2008.
2	distance_to_treeline, bioclimatic zone	CAVM Team. 2003. Circumpolar Arctic Vegetation Map. Scale 1:7,500,000. Conservation of Arctic Flora and Fauna (CAFF) Map No. 1. U.S. Fish and Wildlife Service, Anchorage, Alaska.	Walker, D.A., et al., The circumpolar Arctic vegetation map. J Veg Sci, 2005. 16: p. 267-282.
3	climate_axis_1, climate_axis_2, climate_axis_3	Fick, S. E., & Hijmans, R. J. (2017). WorldClim 2: new 1‐km spatial resolution climate surfaces for global land areas. International Journal of Climatology, 37(12), 4302-4315. Speed et al. in prep (for the PCA axes of variation).	Original climatic variables from WorldClim: Fick, S.E. and R.J. Hijmans, WorldClim 2: new 1‐km spatial resolution climate surfaces for global land areas. International Journal of Climatology, 2017. 37(12): p. 4302. PCA axes of variation were not calculated in the final analyses.
4	growing_season, productivity, extent_of_recent_greening, extent_of_recent_growing_season_change	Park, T., Ganguly, S., Tømmervik, H., Euskirchen, E. S., Høgda, K. A., Karlsen, S. R., ... & Myneni, R. B. (2016). Changes in growing season duration and productivity of northern vegetation inferred from long-term remote sensing data. Environmental Research Letters, 11(8), 084001.	Park, T., et al., Changes in growing season duration and productivity of northern vegetation inferred from long-term remote sensing data. Environmental Research Letters, 2016. 11(8): p. 084001; Fauchald, P., et al., Arctic greening from warming promotes declines in caribou populations. Science Advances, 2017. 3(4): p. e1601365.
5	distance_from_coast	Coastline & Islands used in the creation of the Circumpolar Arctic Vegetation Map (reference nr. 2)	Derived from coastline and islands used in the creation of the Circumpolar Arctic Vegetation Map: Walker, D.A., et al., The circumpolar Arctic vegetation map. J Veg Sci, 2005. 16: p. 267-282.
6	soil_type	Circumpolar Arctic Substrate Chemistry used in the creation of Circumpolar Arctic Vegetation Map (reference 2).	FAO-UN - Land and Water Division (CBL), Digital Soil Map of the World 2007.
8	recent_warming	GISTEMP Team, 2016: GISS Surface Temperature Analysis (GISTEMP). NASA Goddard Institute for Space Studies. Hansen, J., R. Ruedy, M. Sato, and K. Lo, 2010: Global surface temperature change, Rev. Geophys., 48, RG4004, doi:10.1029/2010RG000345.	GISTEMP Team, GISS Surface Temperature Analysis (GISTEMP). 2016, NASA Goddard Institute for Space Studies.; Hansen, J., et al., Global surface temperature change. Rev. Geophys, 2010. 48.
9	herbivore_diversity	Barrio, I. C., Bueno, C. G., Gartzia, M., Soininen, E. M., Christie, K. S., Speed, J. D., ... & Hoset, K. S. (2016). Biotic interactions mediate patterns of herbivore diversity in the Arctic. Global Ecology and Biogeography, 25(9), 1108-1118.	Speed, J.D., et al., Trophic interactions and abiotic factors drive functional and phylogenetic structure of vertebrate herbivore communities across the Arctic tundra biome. Ecography, 2019. 42(6): p. 1152-1163.
10	permafrost	Brown, J., O. Ferrians, J. A. Heginbottom, and E. Melnikov. 2002. Circum-Arctic Map of Permafrost and Ground-Ice Conditions, Version 2. Boulder, Colorado USA. NSIDC: National Snow and Ice Data Center.	Brown, J., et al., Circum-Arctic Map of Permafrost and Ground-Ice Conditions, Version 2. 2002, NSIDC: National Snow and Ice Data Center. Boulder, Colorado USA
